# Omitted variable bias in GLMs of neural spiking activity

Ian H. Stevenson<sup>1,2,3</sup>

<sup>1</sup>University of Connecticut, Department of Psychological Sciences

<sup>2</sup>University of Connecticut, Department of Biomedical Engineering

<sup>3</sup>CT Institute for Brain and Cognitive Sciences

## Abstract

Generalized linear models (GLMs) have a wide range of applications in systems neuroscience describing the encoding of stimulus and behavioral variables as well as the dynamics of single neurons. However, in any given experiment, many variables that directly impact neural activity are not observed or not modeled. Here we demonstrate, in both theory and practice, how these omitted variables can result in biased parameter estimates for the effects that are included. In three case studies, we estimate tuning functions for common experiments in motor cortex, hippocampus, and visual cortex. We find that including traditionally omitted variables changes estimates of the original parameters and that modulation originally attributed to one variable is reduced after new variables are included. In GLMs describing single-neuron dynamics, we then demonstrate how post-spike history effects can also be biased by omitted variables. Here we find that omitted variable bias can lead to mistaken conclusions about the stability of single neuron firing. Omitted variable bias can appear in any model where omitted variables modulate neural activity and the effects of the omitted variables covary with the included effects. Understanding how and to what extent omitted variable bias affects parameter estimates is likely to be important for interpreting the parameters and predictions of many neural encoding models.

## Introduction

Regression models have been widely used in systems neuroscience to explain how external stimulus and task variables as well as internal state variables may relate to observed neural activity (Brown et al., 2003; Kass et al., 2005). However, in many cases, the full set of variables that explain the activity of the observed neurons is not observed or is not even known. It is important to recognize that, in these cases, omitted variables can cause the parameter estimates for the effects that are included in a regression model to be biased. That is, parameter estimates for the modeled effects would be different if other, omitted variables were to be included in the model. In experiments from behaving animals (Niell and Stryker, 2010; Reimer et al., 2014), but also in more controlled sensory tasks (Kelly et al., 2010; Arandia-Romero et al., 2016), there is growing evidence that neural activity is affected by many more variables than are typically considered relevant (Kandler et al., 2017; Stringer et al., 2018). At the same time, although it has received some attention in other fields (Greenland, 1989; Clarke, 2005), omitted variable bias, as a general problem, appears underappreciated in systems neuroscience. Here we demonstrate why systematically considering omitted variable bias may be important and examine how omitted variable bias can affect one popular framework for describing neural spiking activity – the generalized linear model (GLM) with Poisson observations.

39 In modeling neural activity, omitted variable bias can appear in any situation where neurons are  
40 modulated by omitted variables and the omitted variables are not independent from the variables  
41 included in the model – the ones whose effects we are trying to estimate. To give a concrete  
42 example, imagine an idealized neuron in primary motor cortex (M1) whose firing, unlike typical M1  
43 neurons (Georgopoulos et al., 1982), is not at all modulated by reach direction but, instead, is  
44 modulated by reach speed (Fig 1). If the average speed differs across reach directions, such a  
45 neuron will appear to be tuned to reach direction, despite not being directly affected by direction.  
46 First, fitting a typical tuning curve for reach direction, we would infer that such a neuron has a clear  
47 preferred direction and non-zero modulation depth. On the other hand, if we then fit a second  
48 model that included both reach direction and speed, we would infer that the neuron is modulated  
49 by speed alone, and it would be apparent that the original preferred direction and modulation  
50 depth estimates were biased due to the omitted variables.

51 In adding additional variables, previous studies have largely focused on the fact that including  
52 previously omitted variables improves model accuracy or the fact that neural activity is often  
53 influenced by a host of task variables. In M1, for instance, including speed improves model  
54 accuracy (Moran and Schwartz, 1999), but the presence of many correlated motor variables (e.g.  
55 kinematics, end-point forces, muscle activity) makes it difficult to interpret how neurons represent  
56 movement overall (Humphrey et al., 1970; Omrani et al., 2017). Here, instead of focusing on the  
57 advantages and complexities of models with many variables, we focus on the fact that the  
58 parameters describing the original effects change as additional variables are included. The  
59 hypothetical M1 neuron above points to a more general set of questions about regression models  
60 of neural activity. How do we decide what variables to include? and What happens when we cannot  
61 or do not include variables that are relevant to the process that we are modeling?

62 Here we first evaluate the statistical problem of omitted variable bias in the canonical generalized  
63 linear model with Poisson observations. Then, as a case study, we examine how speed affects  
64 estimates of direction tuning of neurons in primary motor cortex, as well as, two other case studies  
65 where the spike counts are modeled as a function of external variables: orientation tuning in  
66 primary visual cortex (V1) and place tuning in the hippocampus (HC). In each of these case studies  
67 we find that commonly omitted variables (speed in M1, population activity in V1, and speed and  
68 heading in HC) can bias the estimated effects of commonly included variables (reach direction in  
69 M1, stimulus orientation/direction in V1, and place in HC). Across all three case studies, including  
70 the omitted variables reduces the estimated modulation due to typical tuning effects. We also  
71 illustrate how omitted variable bias can affect generalized linear models of spike dynamics where  
72 a post-spike history filter aims to describe refractoriness and bursting (Truccolo et al., 2005). The  
73 goal of these models is typically to differentiate aspects of spike dynamics that are due to the  
74 neurons own properties (e.g. membrane time constant, resting potential, after-hyper-polarization  
75 currents) from those due to input to the neuron from other sources (Brillinger and Segundo, 1979;  
76 Paninski, 2004). In this setting, the input to the neuron is typically not directly observed, but is  
77 approximated by stimulus or behavioral covariates, local field potential, or the activity of other  
78 neurons. Here we show that omitting the input can lead to large biases in post-spike history filters,

79 and that including omitted variables describing the input can change the interpretation and  
80 stability of the estimated history effects.

81 GLMs have been used in many settings to disentangle the effects of multiple, possibly correlated,  
82 stimulus or task variables (Fernandes et al., 2014; Park et al., 2014; Runyan et al., 2017) and also  
83 to model neural mechanisms such as post-spike dynamics, interactions between neurons, and  
84 coupling to local fields (Harris et al., 2003; Truccolo et al., 2005; Pillow et al., 2008). It is often argued  
85 that GLMs are advantageous because they have unique maximum likelihood estimates and can  
86 be more robust to non-spherical covariate distributions than other methods, such as spike-  
87 triggered averaging (Paninski, 2004; Pillow, 2007). Although, these advantages shouldn't be  
88 dismissed, it is important to realize that GLMs are not immune to bias. Here we show how the  
89 possibility of omitted variable bias, in particular, should encourage researchers to be cautious in  
90 their interpretation of model parameters, even in cases where a GLM achieves high predictive  
91 accuracy.

## 92 Results

93 Here we introduce the problem of omitted variable bias and examine differences between omitted  
94 variable bias in linear models and the canonical Poisson GLM. We then consider three tuning curve  
95 estimation problems: estimating direction tuning in primary motor cortex, place tuning in  
96 hippocampus, and orientation tuning in primary visual cortex and show how omitted variables in  
97 each of these three cases can alter parameter estimates. Finally, we consider a GLM that aims to  
98 describe the dynamics of post-spike history and show how omitted inputs can bias the estimated  
99 history effects and qualitatively change model stability.

### 100 Omitted Variable Bias in Linear Regression and canonical Poisson GLMs

101 When relevant variables are not included in a regression model, the estimated effects for the  
102 variables that are included can be biased (Box, 1966). Omitted variable biases can cause the  
103 parameters describing the effects of the original variables to be over- or under-estimated, and  
104 model fits can change qualitatively when omitted variables are included (Fig 1).

105 To understand the problem of omitted variable bias it will be helpful to briefly review the case of  
106 multiple linear regression, where the bias can be described analytically. In the linear setting,  
107 consider the generative model

$$108 \quad y = X\beta + X_h\beta_h + \epsilon$$

109 where observations  $y$  are a linear combination of observed  $X$  and omitted  $X_h$  variables plus  
110 normally-distributed i.i.d. noise  $\epsilon \sim N(0, \sigma)$ . For simplicity, we ignore the intercept term, but in the  
111 analysis that follows it may also be considered as part of  $X$ . If we then fit the (mis-specified) model  
112 without the hidden variables using ordinary least squares (OLS) the estimated parameters will be

$$113 \quad \hat{\beta} = (X^T X)^{-1} X^T y$$
$$114 \quad = \beta + (X^T X)^{-1} X^T X_h \beta_h + o(\epsilon)$$

115 where  $o(\epsilon)$  denotes the effect of noise. Although the noise term will disappear as more data is  
 116 added  $\lim_{n \rightarrow \infty} o(\epsilon) = 0$ , the bias  $(X^T X)^{-1} X^T X_h \beta_h$  will, generally, be non-zero. There will be no bias only  
 117 in the cases where the omitted variables do not affect the observations ( $\beta_h = 0$ ) or when the  
 118 omitted variables and observed variables are uncorrelated ( $X^T X_h = 0$ ). Note that  $(X^T X)^{-1} X^T X_h$  is  
 119 the matrix of regression coefficients from using OLS to predict each of the omitted variables using  
 120 the observed variables as predictors. For linear regression, the omitted variable bias thus depends  
 121 on both the extent to which the omitted variables affect the observations  $\beta_h$  and the extent to  
 122 which the omitted variables can be (linearly) predicted from the observed variables.

123 Although there is a closed-form solution for the omitted variable bias for linear regression, the  
 124 generalized linear setting is not as tractable (Clogg et al., 1992). We will consider the case of a  
 125 canonical Poisson GLM, in particular, where

$$126 \quad \lambda = \exp(X\beta + X_h \beta_h)$$

$$127 \quad y \sim \text{Poisson}(\lambda)$$

128 In the more general case, GLMs have

$$129 \quad E[y] = g^{-1}(X\beta + X_h \beta_h)$$

130 where  $g^{-1}(\cdot)$  is the inverse link function, and  $y$  is distributed following an exponential family  
 131 distribution. For a canonical GLM the log-likelihood takes the form

$$132 \quad \mathcal{L}(\beta, \beta_h) \propto \sum_i y_i (X_i \beta + X_{h,i} \beta_h) - G(X_i \beta + X_{h,i} \beta_h) + \text{const}(\beta, \beta_h)$$

133 where the nonlinear function  $G(\cdot)$  depends on both the link function and the noise model. For  
 134 canonical GLMs, this log-likelihood is concave and the maximum likelihood estimate  $\hat{\beta}$  satisfies  
 135  $\left. \frac{\partial \mathcal{L}}{\partial \beta} \right|_{\hat{\beta}} = 0$ . The exact form of  $G(\cdot)$  will depend on the model, but for linear regression  $G(x)$  is  
 136 proportional to  $\frac{x^2}{2}$ , and for canonical (log-link) Poisson regression  $G(\cdot) = \exp(\cdot)$ .

137 Now, with omitted variables, instead of maximizing the correct log-likelihood, we maximize instead  
 138 maximize

$$139 \quad \mathcal{L}_o(\beta) \propto \sum_i y_i (X_i \beta) - G(X_i \beta) + \text{const}(\beta)$$

140 For the omitted variable bias in  $\hat{\beta}$  to be 0, we need both  $\left. \frac{\partial \mathcal{L}}{\partial \beta} \right|_{\hat{\beta}} = 0$  and  $\left. \frac{\partial \mathcal{L}_o}{\partial \beta} \right|_{\hat{\beta}} = 0$  at the same value  
 141 of  $\beta$ . Although, neither MLE has a closed form solution, this condition implies that, if there is no  
 142 bias due to the omitted variables,

$$143 \quad X^T G'(X\beta + X_h \beta_h) = X^T G'(X\beta)$$

144 where  $G'(\cdot)$  is the derivative of  $G(\cdot)$ . For linear regression this equality reduces to the OLS form  
 145 derived above, and for canonical Poisson regression we have

$$146 \quad X^T \exp(X\beta + X_h \beta_h) = X^T \exp(X\beta)$$

147 This equality is satisfied when observations are not modulated by the hidden variables  $X_h\beta_h=0$  or,  
 148 more generally, when the effect of the hidden variables  $\delta\lambda = \exp(X\beta + X_h\beta_h) - \exp(X\beta)$  is  
 149 orthogonal to the included variables  $X$ . Note that with linear regression,  $X^T X_h = 0$  implies that the  
 150 estimates will not be biased, but here this is not the case unless  $X^T \delta\lambda = 0$  as well.

151 These conditions are unlikely to be met, in practice, and the maximum likelihood estimate  $\hat{\beta}$  will  
 152 typically be biased under the mis-specified model. However, this mis-specification does not just  
 153 affect the maxima, but also the entire likelihood. Optimization methods, such as Newton's method,  
 154 will typically contain omitted variable bias in each parameter updates. For canonical Poisson  
 155 regression, for instance, the updates take the form

$$156 \quad \hat{\beta}^{k+1} \leftarrow \hat{\beta}^k + (X^T W X)^{-1} X^T (y - \lambda)$$

157 at iteration  $k$  where the weight matrix  $W$  is diagonal with entries  $W_{ii} = \lambda_i$  and  $(X^T W X)^{-1}$  is the  
 158 Fisher scoring matrix (inverse Hessian of the log-likelihood) at the current estimate  $\hat{\beta}^k$ . Since the  
 159 mis-specified model will use  $\lambda = \exp(X\beta)$  instead of the  $\exp(X\beta + X_h\beta_h)$ , both the weight matrix  
 160 and derivatives  $X^T (y - \lambda)$  will be biased at each step of the optimization (except when  $X^T \delta\lambda|_{\beta^k} =$   
 161 0).

162 The parameters of GLMs are, thus, likely to be regularly biased by omitted variables. Other  
 163 properties of the MLE may also be affected. For instance, if omitted variables bias the parameters  
 164 themselves we should also be cautious interpreting the parameter standard errors, since  $\widehat{se}_i =$   
 165  $\sqrt{((X^T W X)^{-1})_{ii}}$ . In addition, omitted variables can lead to misestimation of the variability in  $E[y]$   
 166 and dispersion  $var(y)$ . If the omitted variables affect the observations, then they will generally  
 167 increase the variability of  $E[y]$ . Then, unless the omitted variables are perfectly predicted by the  
 168 included variables, the explained variance of the mis-specified model should be lower than that of  
 169 the full model. This may, in turn, lead to overestimates of dispersion, since  $var(y) = E[var(y)] +$   
 170  $var(E[y]) = E[var(y)] + var(\lambda)$ .

171 **Figure 1:** When relevant variables are omitted from the model, estimates of the  
 172 included effects can be biased. Neuron 1 is  
 173 not tuned to the observed variable  $x$ , but the  
 174 fact that  $x$  and  $x_h$  covary leads to apparent  
 175 tuning to  $x$  when the tuning curve is  
 176 estimated using  $x$  alone. Neuron 2 is tuned  
 177 to  $x$ , but the estimated effect can be biased  
 178 by the hidden variable. Here we show the  
 179 true tuning to  $x$  at different, fixed values of  
 180  $x_h$  (left panels) and the estimated tuning  
 181 when  $x_h$  is omitted (red and blue curves  
 182 correspond to the estimates with two  
 183 different joint distributions - matching  
 184 borders, right). Dashed line denotes the  
 185 effect of  $x$  when  $x_h$  is fixed.  
 186

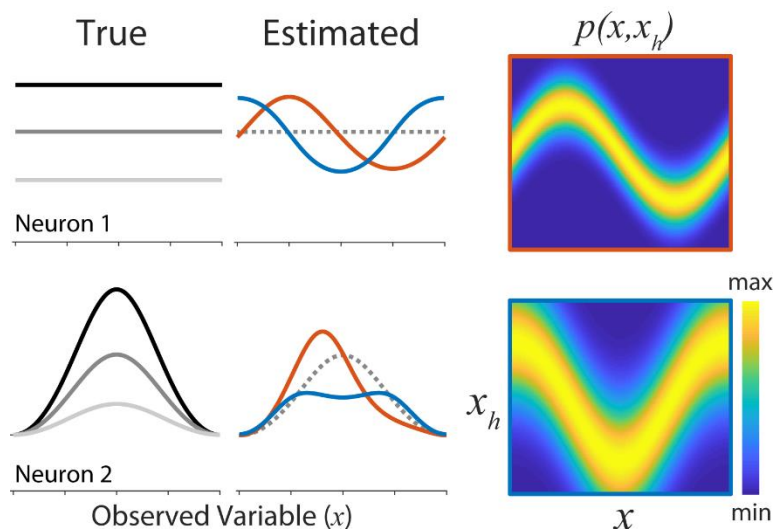

## 187 **Omitted Variable Bias in Tuning Curve Estimation**

188 To illustrate how omitted variable bias affects GLMs of neural spiking, not just in theory, but in  
189 practice, we consider three case studies where we fit typical tuning curve models that omit  
190 potentially relevant variables along with augmented models that include these additional  
191 variables. We first consider modeling spike counts across trials and on slow (>100ms) timescales.  
192 Here we assess 1) the tuning of neurons in motor cortex to reach direction, with speed as a  
193 potential omitted variable, 2) the tuning of neurons in hippocampus to position, with both speed  
194 and head-direction as potential omitted variables, and 3) the tuning of neurons in visual cortex to  
195 the direction of motion of a sine-wave grating, with population activity as a potential omitted  
196 variable. In each of these cases studies, we show how the omitted variables are not independent  
197 from the commonly included variables and how neural responses are modulated by the omitted  
198 variables. These two properties, together, can lead to omitted variable biases.

199 In our first case study, we model data recorded from primary motor cortex (M1) of a macaque  
200 monkey performing a center-out, planar reaching task. In this task, speed differs systematically  
201 across reach directions (Fig 2A), with average speed differing by as much as  $35\pm 3\%$  (for the targets  
202 at 45 and 225 deg relative to right, Fig 2B). To model neural responses, we first fit a traditional  
203 tuning curve model (Georgopoulos et al., 1982; Amirikian and Georgopoulos, 2000), where the  
204 predicted responses depend only on target direction. Here we use a circular, cubic B-spline basis  
205 (5 equally spaced knots) to allow for deviations from sinusoidal firing, but, in most cases, the  
206 responses of the  $n=81$  neurons in this experiment are well described by cosine-like tuning curves  
207 with clear modulation for reach direction. We then fit a second model that includes effects from  
208 movement speed. Here we use covariates based on (Moran and Schwartz, 1999), including a linear  
209 speed effect, as well as, cosine-tuned direction-speed interactions (see Methods). This model  
210 captures the responses of individual neurons, where spike counts can increase (Fig 2C, top) or  
211 decrease (Fig 2C, middle) as a function of speed, and, in some cases, speed and direction appear  
212 to interact (Fig 2C, bottom). Together, the fact that direction and speed are not independent along  
213 with the fact that neural responses appear to be modulated by speed could lead to biased  
214 parameters estimates for the model where speed is omitted.

215 Comparing the models with and without omitted variables we find that, averaged across the  
216 population, there are only minimal shifts in the preferred direction ( $3\pm 2$  deg) when speed is  
217 included in the traditional tuning curve model, and there do not appear to large, systematic shifts  
218 in the population distribution of PDs (Kuiper's test,  $p>0.1$ ). At the same time, there is substantial  
219 variability between neurons in the size of the PD-shift (circular SD  $32\pm 5$  deg). Across the  
220 population, modulation depth (measured using the standard deviation of the tuning curve)  
221 decreases slightly on average ( $3\pm 2\%$ ), and the size of the modulation change also varies  
222 substantially between individual neurons (SD of changes  $18\pm 3\%$ ). An example neuron in Fig 1C  
223 (bottom), for instance, has a modulation decrease of  $9\pm 5\%$  and the preferred direction changes  
224  $4\pm 9$  deg when speed is included in the model (standard error from bootstrapping). Overall,  $\sim 10\%$   
225 of neurons have statistically significant changes in PD, and  $\sim 14\%$  have significant changes in

226 modulation (bootstrap tests  $\alpha=0.05$ , not corrected for multiple comparisons). For some individual  
227 neurons, at least, the parameters of the model without speed, thus, have clear omitted variable  
228 bias. However, since individual neurons have diverse speed dependencies, in this case, the  
229 average biases across the population are minimal.

230 When speed is included in the model, model accuracy does increase slightly ( $p=0.01$ , one-sided  
231 paired t-test). The average cross-validated (jack-knife) pseudo- $R^2$  for the original model is  $0.23\pm 0.01$   
232 and for the model with speed  $0.24\pm 0.01$  (Fig 5). However, it seems likely that in other experimental  
233 contexts the effects of omitting speed would be more pronounced. Here, the relatively small  
234 number of trials (290) and reach directions (8) limits the complexity of the models that can be used  
235 before over-fitting occurs. Additionally, since all targets were the same size and distance from the  
236 initial position, the distribution of speeds is likely less variable than for reaches between more  
237 varied targets (Fitts, 1954). By requiring the animal to make reaches to the same targets at different  
238 speeds, previous studies have more clearly demonstrated that responses in M1 are modulated by  
239 speed (Churchland et al., 2006). Here we demonstrate how this type of modulation can lead to  
240 omitted variable biases in the estimated parameters of typical tuning curve models without speed.

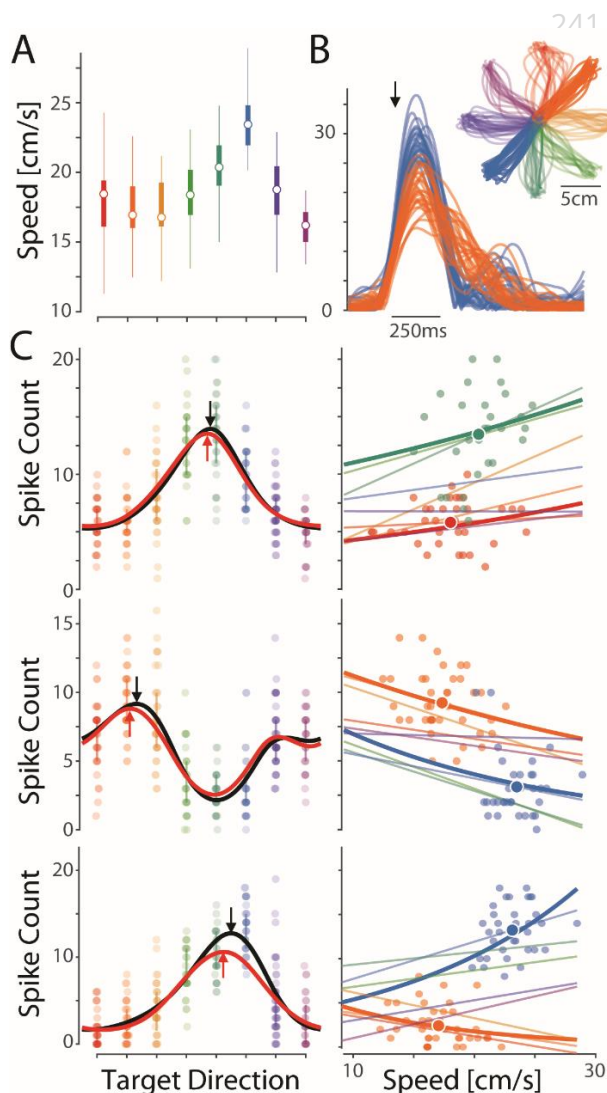

**Figure 2:** Speed as an omitted variable in M1 tuning for reach direction. A) The distribution of reach speeds differs by target direction in a center-out task. Circles denote median, boxes denote IQR. B) Speed profiles for the two targets showing the largest speed differences. Individual traces denote individual trials aligned to the half-max (black arrow). Inset shows the position of each trial with colors denoting reach direction. C) The responses of 3 M1 neurons show typical tuning for reach direction. The tuning curve estimated using direction covariates alone (black) changes when speed covariates are included (red). Red curves denote the direction effect within the full model and are generated by assuming speed is constant (equal to the mean speed across all trials). Right panels illustrate the speed dependence for the preferred direction and its opposite. Dark lines denote the estimated effect of speed under the full model. Data points show single trial data, along with the mean speed and rate for each direction (big data point). Light lines show linear trends (OLS) using only the trials from each specific target.

266 In our second case study we examine the activity of neurons in the dorsal hippocampus of a rat  
267 foraging in an open field. Here we consider to what extent the practice of omitting speed and head  
268 direction from a place field model biases estimates of a neuron's position tuning. As in the first  
269 case study, omitted variable bias can occur if neural activity is modulated by omitted variables and  
270 the omitted variables covary with the included variables. In the case of the hippocampus, neural  
271 activity is known to be modulated by both movement speed and head direction (McNaughton et  
272 al., 1983), in addition to an animal's position (O'Keefe and Dostrovsky, 1971). Additionally,  
273 behavioral variables can be highly nonuniform across the open field (Walsh and Cummins, 1976),  
274 for instance, near and far from the walls. Together the fact that the omitted variables may covary  
275 with position and the fact that neurons appears to be modulated by the omitted variables, suggest  
276 that there may be omitted variable bias.

277 Here, in one recording during an open field foraging task we find that the average speed (Fig 2A)  
278 and heading (Fig 2B) differ extensively as a function of position. Within a given neuron's place field,  
279 the distributions of speed and heading may be very different from their marginal distributions.  
280 Across the population of  $n=68$  place cells (selected from 117 simultaneously recorded neurons,  
281 see Methods), average in-field speed was between 80-135% of the average overall speed (5.5cm/s),  
282 and the animal's heading can be either more or less variable in-field (circular SD 57-80 deg)  
283 compared to overall (75 deg).

284 As previous studies have shown, we also find that neural responses are modulated by speed and  
285 head direction. Responses due to place, speed, and heading are shown for one example neuron  
286 in Fig 3. This neuron shows a stereotypical place-dependent response (Fig 2B), but splitting the  
287 observations by speed (Fig 3C, top) or heading (Fig 3B, bottom) by quartiles/quadrants reveals that  
288 there is also tuning to these variables. The neuron appears to increase its firing with increasing  
289 speed and responds most strongly when the rat is facing the left. These dependencies are well fit  
290 by the full model where the firing rate depends, not just on position, but also on the (log-  
291 transformed) speed and the heading (Fig 3D, bottom). For the example place cell shown here, the  
292 location of the place-field does not change substantially when the omitted variables are included  
293 (Fig 3E). However, the modulation (SD of the rate map) decreases by 27%. That is, 27% of the  
294 apparent modulation due to position when it is modeled alone, can be explained by speed and  
295 heading effects.

296 Across the population of place cells, there were no clear, systematic difference in the place field  
297 locations, but the modulation (SD of the rate map  $\lambda(x)$ ) decreases by  $9\pm 1\%$  on average when speed  
298 and heading are included. Individual neurons showed substantial variability in their modulation  
299 differences (population SD  $10\pm 1\%$ ). As in M1, including the omitted variables increased spike  
300 prediction accuracy – the average cross-validated (10-fold) pseudo- $R^2$  was  $.29\pm .02$  for the original  
301 model and  $.31\pm .02$  for the model including speed and heading activity. This difference seems small,  
302 since there is large variability in pseudo- $R^2$  values across the population, but the average increase  
303 in pseudo- $R^2$  was  $11\pm 3\%$  (Fig 5). Given that neurons appear to be modulated by speed and heading,  
304 it is unsurprising that including these variables improves model fit. However, as before, it is



305 important to note that this modulation can lead to biases in the place field estimates for the model  
306 with only position.

307

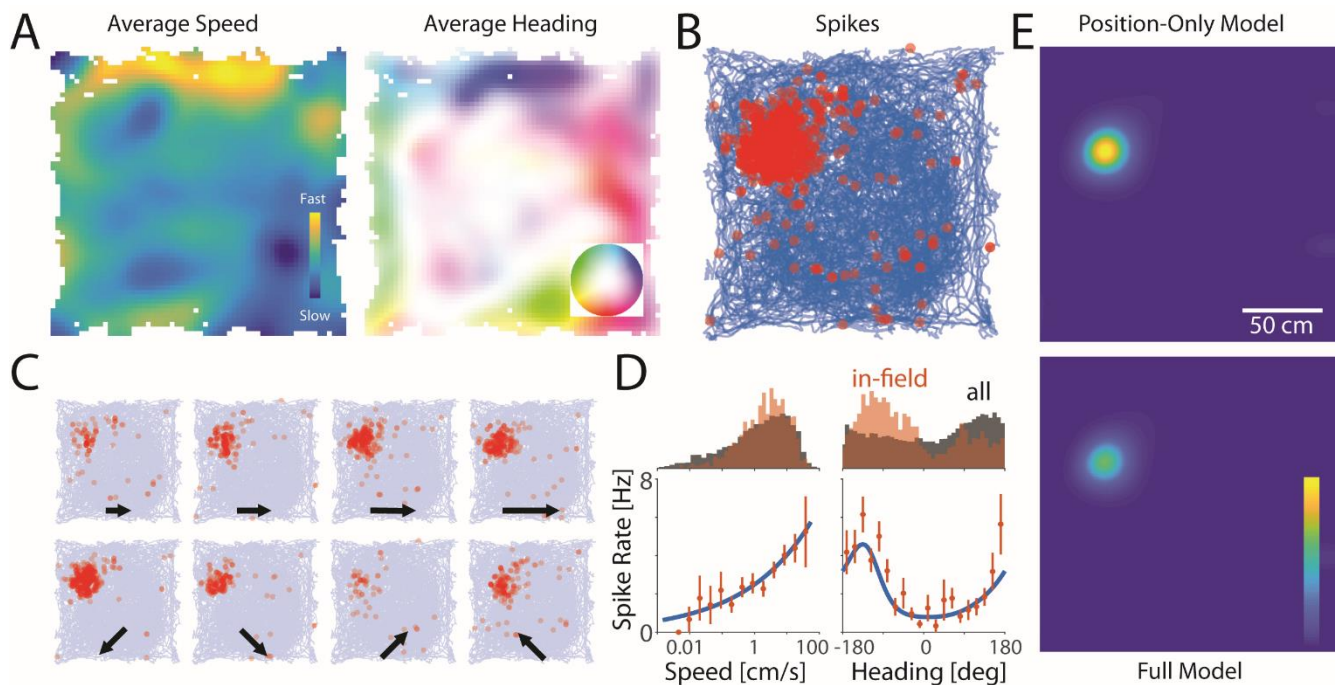

308

309 **Figure 3:** Speed and heading as omitted variables in hippocampal place cells. A) Average speed and heading  
310 as a function of position for a rat foraging in an open field. B) An example place cell tends to spike (red dots)  
311 when the animal is at a specific position in space. C) The activity of this neuron is modulated by the animal's  
312 speed (top row) and heading (bottom row). Speed is split into quartiles, subplots include all headings.  
313 Heading is split into quadrants, subplots include all speeds. D) The distributions of speed and heading within  
314 the place field differ from the overall distributions, and the neuron is tuned to these variables. Blue curve  
315 shows model fit. E) After modeling the effect of speed and heading within the place field, the location of the  
316 place field does not change but the apparent modulation due to position is reduced.

317 In our third case study, we examine the activity of neurons in a more controlled sensory  
318 experiment. Here we use data recorded from primary visual cortex (V1) of an anesthetized monkey  
319 viewing oriented sine-wave gratings moving in on of 12 different directions (see Methods). In this  
320 experiment, variability in the animal's behavior is purposefully minimized, and, instead of  
321 considering the effect of omitting a behavioral variable, here we consider the effect of omitting a  
322 variable relating to the animal's internal state – the total population activity. Several studies have  
323 previously shown that population activity alters neural responses in V1 (Arieli et al., 1996; Kelly et  
324 al., 2010; Okun et al., 2015; Arandia-Romero et al., 2016). If the distribution of population activity  
325 also varies with stimulus direction, then there is the potential for omitted variable bias.

326 Here we assess neural activity from n=90 simultaneously recorded neurons across many (2400)  
327 repeated trials with 12 different movement directions. We find that there is high trial-to-trial  
328 variability in the population rate (Fig 4A), and the average firing across all neurons does differs

329 across stimulus directions, up to ~50%. For this recording, the most extreme differences were  
330 between the 180 deg stimulus where the average rate across the population was  $3.4 \pm 0.1$  Hz and  
331 the 60 deg stimulus where the average rate was  $6.3 \pm 0.1$  Hz (Fig 4B). By adding the (log-  
332 transformed) population rate as a covariate to a more typical model of direction tuning, we find  
333 that population activity may lead to omitted variable bias in models of direction tuning alone.

334 As in the case studies above, there do not appear to be any consistent or systematic effects on the  
335 preferred stimulus direction at the population level (Kuiper's test,  $p=0.1$ ). However, the modulation  
336 depth (measured using SD of the tuning curve) decreases substantially  $15 \pm 2\%$  when population  
337 rate is included in the model, and there is again high variability across neurons (SD  $20 \pm 2\%$ ). In this  
338 case, model accuracy increases substantially when the omitted variable is included. The cross-  
339 validated (10-fold) pseudo- $R^2$  is  $.26 \pm .02$  for the original model and  $.43 \pm .02$  for the model including  
340 population activity, with an average increase of  $164 \pm 31\%$  (Fig 5).

341

342 **Figure 4:** Population rate as an omitted variable  
343 in primary visual cortex. A) Correlated trial to trial  
344 variability. Population rasters for three trials of  
345 the same drifting grating stimulus (0 deg, red and  
346 30 deg, orange). Neurons are sorted by overall  
347 firing rate. B) Histograms of the population rate  
348 across trials. As a population, the neurons  
349 respond at higher rates to 30 deg stimuli, but  
350 there is high trial-to-trial variability. C) The  
351 responses of 2 V1 neurons show typical tuning  
352 for direction of motion. The tuning curve  
353 estimated using direction covariates alone (black)  
354 changes when the population rate covariate are  
355 included (red). Right panels illustrate the  
356 dependence for the preferred direction and an  
357 orthogonal direction. Dark lines denote the  
358 estimated effect of speed under the full model.  
359 Data points show single trial data, along with  
360 the mean count and rate (big data point). Light  
361 lines show linear trends (OLS) using only the  
362 trials from each specific stimulus.

363

364

365

366

367

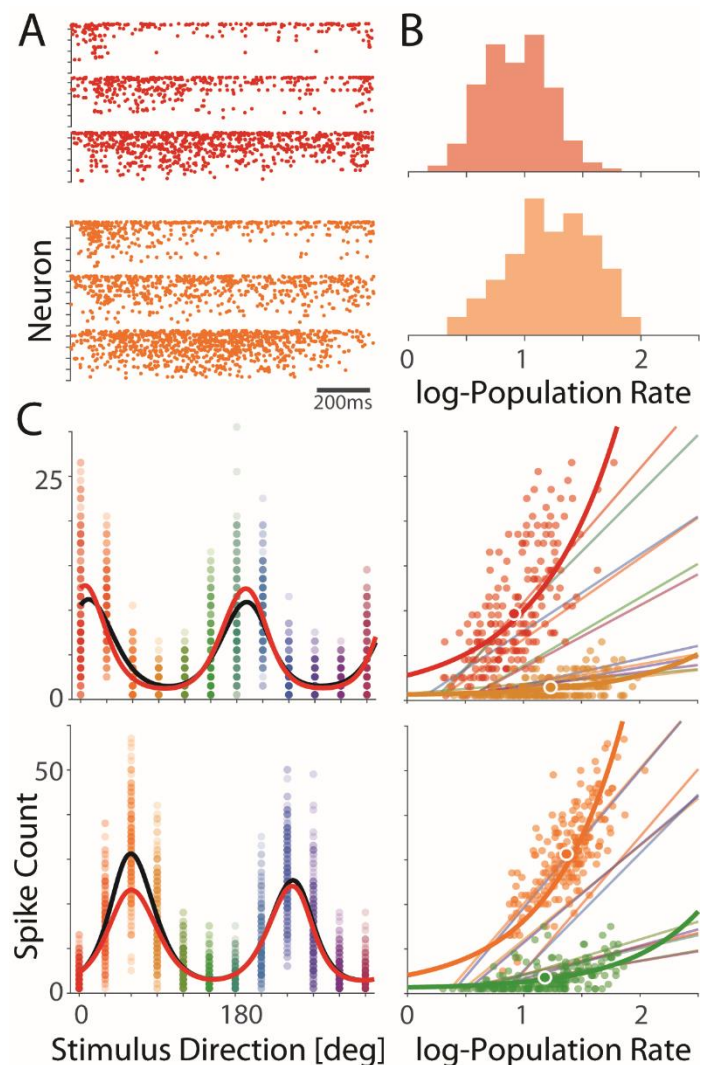

368 Unlike in M1 where the effect of speed was highly diverse for different neurons, in this case study  
369 the effect of the population rate is largely consistent. Higher population rates are associated with  
370 higher firing rates, and, for most neurons, the effect of the population rate is stronger in the  
371 preferred direction(s), consistent with a multiplicative effect. Note that here, we do not include the  
372 neuron whose rate we are modeling in the calculation of the population rate. However, using the  
373 population rate as an omitted variable requires some interpretation. The population rate will  
374 certainly be affected by the tuning of the, relatively small, sample of neurons that we observe. If  
375 we have a disproportionate number of neurons tuned to a specific preferred direction, the  
376 population rate in those directions will be higher. This suggests that in a different recording, the  
377 covariation between the stimulus and the population rate could very likely be different. However,  
378 it appears that the omitted variable biases in this case are mostly driven by noise correlations,  
379 where neural activity is correlated on single trials even within the same stimulus condition, rather  
380 than stimulus correlations, where neural activity is correlated due to similar tuning. When we  
381 shuffle the data within each stimulus condition (removing noise correlations) the average change  
382 in the modulation depth is  $-1 \pm 2\%$  (SD  $18 \pm 3\%$ ), and the effect of the omitted variable becomes  
383 negligible.

384

385

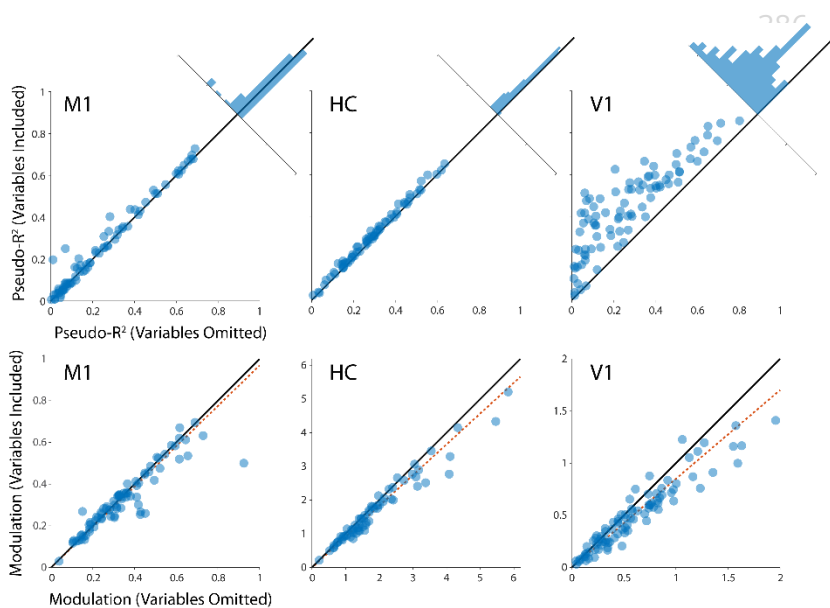

**Figure 5:** For each of the case studies, on average, the model accuracy increases when omitted variables are included (top) and the modulation due to the original variables decreases (bottom). Scatter plots indicate cross-validated pseudo-R<sup>2</sup> values for each neuron under the two models. Modulation denotes the standard deviation of the tuning to the original variable(s) under each model. Here, modulation values are normalized by the average rate of each neuron.

400

401

402

403

404

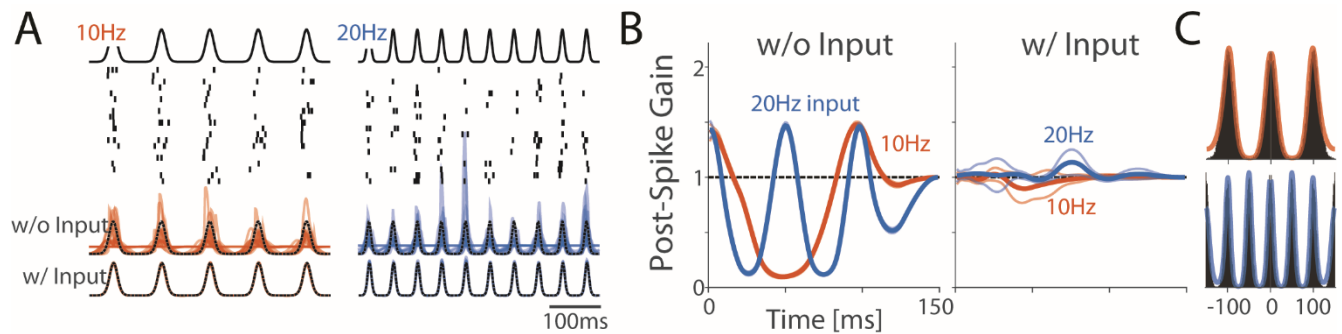

405

406

407

408

409

410

411

412

413

414

415

416

417

**Figure 6:** Estimated post-spike history filters can be heavily biased when the input is not included in the model. A) Here we simulate from an inhomogeneous Poisson model with sinusoidal input (no post-spike history effects). The input and spike responses from 20 trials are shown. Although there are no history effects in the generative model, a GLM with history effects that is missing the correct input covariate will use the history terms to capture the structure in the autocorrelation (C). Traces denote the estimated rate for the 20 trials shown above. When the history term is included in the model, but the input is not, the GLM can still reconstruct PSTH responses using the post-spike history alone. B) Post-spike filters for the models in (A) with 95% confidence bands. Note that when input is included in the model the filters correctly reconstruct the true (lack of) filter, and that there is higher uncertainty around the regions where the ISI distribution does not constrain the model.

### 417 Omitted Variable Bias in the Estimation of Post-Spike History Effects

418

419

420

421

422

423

424

425

426

427

In addition to modeling spike counts over trials or on relatively slow (>100ms) behavioral timescales, GLMs are also often used to describe detailed, single-trial spike dynamics on fast (<10ms) timescales. One common covariate used in these types of models is a post-spike history effect where the probability of spiking at a given time depends on the recent history of spiking. Modeling these effects allows us to describe refractoriness, bursting (Paninski, 2004; Truccolo et al., 2005), and a whole host of other dynamics (Weber and Pillow, 2017). Conceptually, the goal of these models is to disentangle the sources of rate variation based only on observations of a neuron's spiking, with history effects, ideally, reflecting intrinsic biophysics. However, since the full synaptic input is typically not known with extracellular spike recordings there is potential for omitted variable biases.

428

429

To illustrate the potential pitfalls of omitting the input to a neuron, consider using the GLM to capture single neuron dynamics in the complete absence of external covariates

430

$$\lambda(t) = \exp(\mu + ah(t))$$

431

432

433

434

435

where the rate  $\lambda$  is determined by a baseline parameter  $\mu$  along with a filtered version of the neuron's past spiking with  $h_i(t) = \sum_{\tau>0} f_i(\tau)n(t - \tau)$ . This is a perfectly acceptable model of intrinsic dynamics, but for most spike data that we observe this isolated neuron model may not provide a realistic description of a neuron receiving thousands of time-varying synaptic inputs. If we fit this model to data where the input to the neuron did vary over time,

436

$$\lambda(t) = \exp(\mu + \alpha h(t) + \beta_h x_h(t))$$

437 then the history filter in the first model will attempt to capture variation in spiking due to the time-  
 438 varying input, in addition to any intrinsic dynamics. For example, when  $x_h$  is periodic, the  
 439 estimated history filters of the original model will attempt to capture this periodic structure (Fig  
 440 6A-B). Just as in the tuning curve examples above, the fact that history effects covary with the input  
 441 and the fact that the input modulates the neuron's firing leads to omitted variable bias. When the  
 442 input is omitted from the model, the biased history effects simply provide the best (maximum  
 443 likelihood) explanation of the observed spiking (Fig 6C).

444 These examples with strong, periodic input are not necessarily biologically realistic, but they make  
 445 it apparent how the post-spike history can be biased by omitted input variables. In vivo, neurons  
 446 instead appear to be in a high-conductance state, where membrane potential fluctuations have  
 447 approximately  $1/f$  power spectra (Destexhe et al., 2001, 2003). When these naturalistic input  
 448 statistics are used to drive the GLM, omitted variable bias can occur, as well. Here we simulate a  
 449 GLM receiving  $1/f^\alpha$  noise input with  $\alpha = 0$  (white noise) 1 and 2 (Fig 7). For white noise input, the  
 450 MLE accurately recovers the simulated post-spike history filter when the input is omitted from the  
 451 model, but when  $\alpha = 1$  or 2 the estimates become increasingly biased (Fig 7A,C). With the full  
 452 model, where the input is included as a covariate, the history is recovered accurately no matter  
 453 what the input statistics are. Just as in the periodic case, however, these different input statistics  
 454 alter the auto-correlation, and, when the input is omitted from the model, the maximum likelihood  
 455 history filter simply aims to capture these patterns.

456

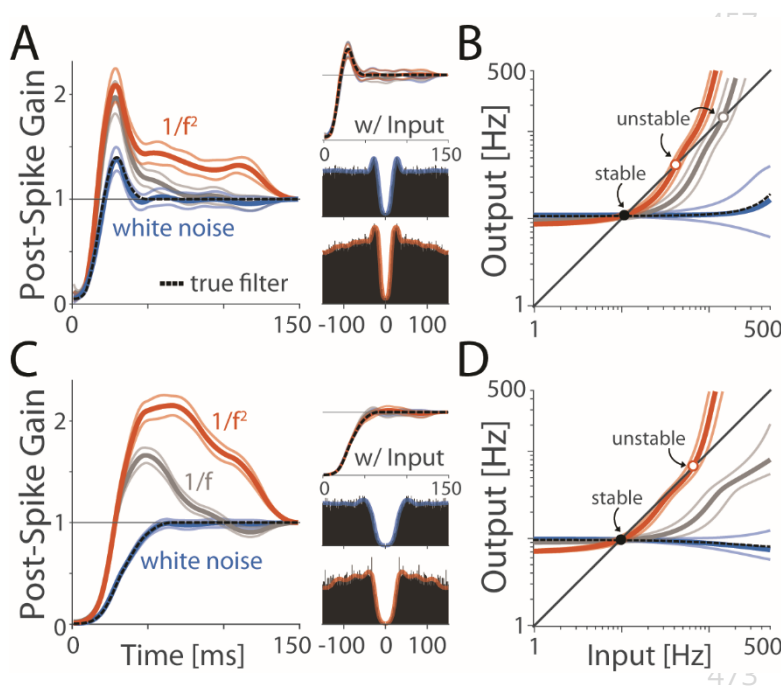

**Figure 7:** Post-spike filters can show omitted variable bias even in a more realistic scenario. Here we simulate from a GLM with a refractory post-spike filter and drive the neurons with  $1/f^\alpha$  noise. Excepting the case of white noise ( $\alpha = 0$ ), the post-spike filters estimated for the GLM without input are heavily biased (A). C) Even when the effect of the true post-spike filter is to strictly decrease the firing rate, the estimated filters can increase the firing rate. B,D) Approximate transfer functions from a quasi-renewal approximation. When the true filter is stable, the estimated filters can result in fragile dynamics.

474 In GLMs for single-neuron dynamics, one effect of omitted variable bias is that it may lead us to  
 475 misinterpret how stable a neuron's dynamics are. Even if the true history filter only reduces the

476 neuron's firing rate following a spike (as in Fig 7C), the estimated filter can be biased upwards when  
477 the input is omitted. If we were to simulate the activity of this neuron based on the biased filter,  
478 the bias could cause the neuron's rate to diverge if the rate becomes high enough. To assess the  
479 stability of the estimated post-spike history effects quantitatively, here we make use of a quasi-  
480 renewal approximation analysis introduced in (Gerhard et al., 2017). Given a history filter, this  
481 approach finds an approximate transfer function describing the neuron's future firing rate (output)  
482 given its recent (input) firing rate (see Methods). For all estimated models, the transfer function  
483 has a stable fixed point near the neuron's baseline firing rate. When the true input is omitted and  
484  $\alpha > 0$ , the estimated history filters also have an unstable fixed point where the neuron's firing rate  
485 will diverge if the rate exceeds this point (Gerhard et al., 2017). Here we find that omitted variable  
486 bias leads to apparent fragility (Fig 7B,D). The stable region shrinks as  $\alpha$  increases, and even when  
487 the true dynamics are strictly stable (as in Fig 7C,D), omitted variable bias can lead us to mistakenly  
488 conclude that the neuron has fragile dynamics.

489 With most extracellular spike recordings, the synaptic input that the neuron receives is unknown.  
490 However, there may also be omitted variable bias when history effects are estimated from real  
491 data. In this case, the input to a neuron can be approximated by stimulus or behavioral variables,  
492 local field potentials, or the activity of simultaneously recorded neurons (Harris et al., 2003;  
493 Truccolo et al., 2005, 2010; Pillow et al., 2008; Kelly et al., 2010; Gerhard et al., 2013; Volgushev et  
494 al., 2015). Just as in the simulations above, including or omitting these variables can then alter the  
495 estimated history effects, even though they are not as directly related to spiking as the synaptic  
496 input itself. Here we consider total population spiking activity as a proxy for synaptic input and  
497 consider how including population activity alters the history filters when compared to a model of  
498 history alone.

499 We examine two datasets: spontaneous activity from primary visual cortex of an anesthetized  
500 monkey with  $n=62$  simultaneously recorded neurons and activity from dorsal hippocampus of a  
501 sleeping rat with  $n=39$  simultaneously recorded neurons. To model population covariates we  
502 sum the spiking of all neurons, excepting the one whose spiking we aim to predict, and low-pass  
503 filter the signal (see Methods). Similar to previous results (Okun et al., 2015), we find that, since  
504 neurons often have correlated fluctuations in their spiking (Fig 8A,D), the population rate is a good  
505 predictor for single neuron activity. Moreover, when we add population covariates to a GLM with  
506 post-spike history effects the history filter changes.

507 In the V1 dataset, the post-spike gain decreases by  $7.8 \pm 0.5\%$  on average when population  
508 covariates are included, and  $14.9 \pm 0.8\%$  when considering only the first 50ms after a spike (Fig 8B).  
509 The effects of adding population covariates are less pronounced in the hippocampal dataset. The  
510 post-spike gain decreases by  $2.5 \pm 0.3\%$  on average, and  $9.5 \pm 1.2\%$  when considering only the first  
511 50ms after the spike (Fig 8E). Based on the quasi-renewal approximation, all neurons in both the  
512 V1 and hippocampal datasets have fragile transfer functions where there is a stable fixed point  
513 (near the neuron's average firing rate) and an unstable fixed point where the neuron's rate  
514 diverges if the input becomes too strong. For V1, the average upper-limit of the stable region is

515 80±3Hz for the models with history only and 143±7Hz for the models with population covariates  
 516 (Fig 8C). In the hippocampal data, the average upper-limit of the stable region is 38±6Hz for the  
 517 models with history only and 75±13Hz for the models with population covariates (Fig 8F). Each  
 518 neuron is, thus, apparently, more stable after the population covariates are included.

519 As in the case studies using tuning curves, adding covariates also improves spike prediction  
 520 accuracy. In the V1 dataset, the average log likelihood ratio relative to a homogeneous Poisson  
 521 model is 2.2±0.3 bits/s for the history model and 3.3±0.3 bits/s for the model with population  
 522 covariates. In hippocampus, the log likelihood ratio is 0.9±0.3 bits/s for the history model and  
 523 2.0±0.5 bits/s for the model with population covariates. The larger effects in V1 are likely explained  
 524 by the fact that the population rate is predictive for many more neurons here than for the  
 525 hippocampal data. In the hippocampus, only 26% of the neurons have an increase of over 0.5  
 526 bits/s when the population covariates are included, compared to 85% of neurons in V1. Altogether  
 527 these results demonstrate how omitted variable bias could affect estimates of post-spike history  
 528 filters in vivo. In both datasets we find that when population covariates are included in the GLM  
 529 spike prediction accuracy increases, post-spike gain decreases, and apparent stability increases.

530

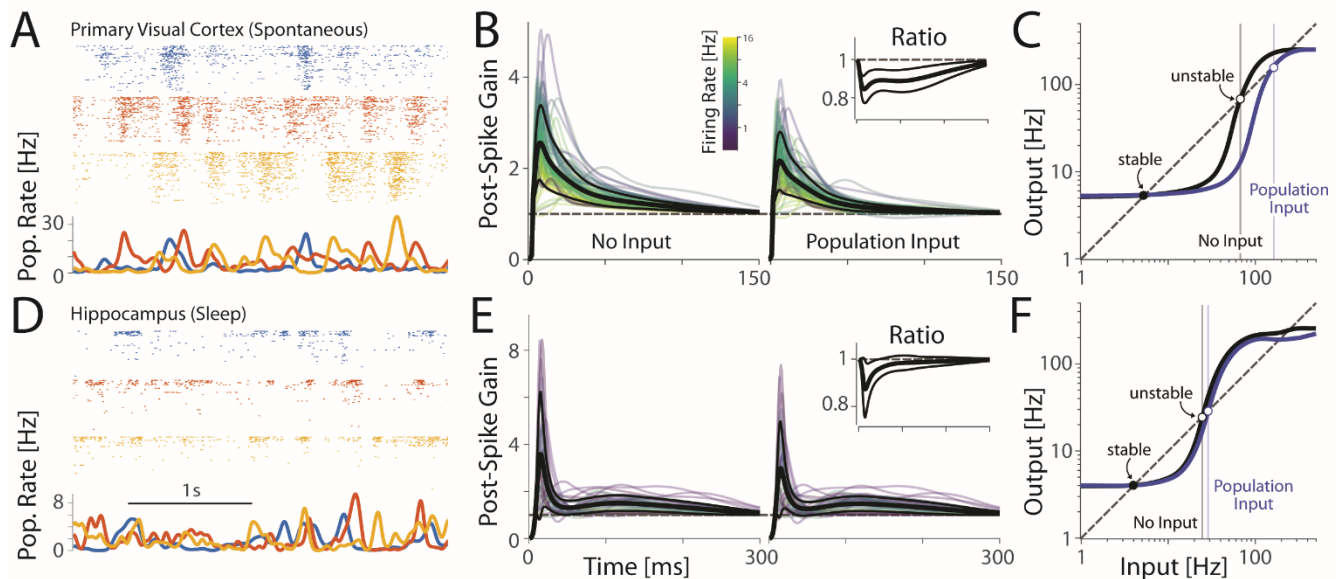

531

532 **Figure 8:** Post-spike filters estimated from real data decrease when population activity is included as a  
 533 covariate. Segments of spontaneous activity are shown for V1 (A) and during sleep for hippocampus (D).  
 534 Neurons are sorted by firing rate. B and E show estimated post-spike filters. Black lines denote the average  
 535 filter (thick) and standard deviation (thin). For clarity, only filters for neurons with firing rates >1Hz are  
 536 shown. C and F show average quasi-renewal transfer functions for the same set of neurons. All neurons  
 537 appear to have fragile dynamics with one stable fixed point near the neuron's average firing rate and an  
 538 unstable fixed point, beyond which the neuron's firing rate diverges. Including population covariates  
 539 increases the region of stability.

## 540 Discussion

541 Here we have illustrated the potential for omitted variable bias in two types of commonly used  
542 GLMs for neural spiking activity: tuning curve models using spike counts across trials and models  
543 that capture single-neuron dynamics with a post-spike history filter. In each model, adding a  
544 previously omitted variable, as expected, improved spike prediction accuracy. However, what we  
545 emphasize here is that, when omitted variables were included, the estimates of the original  
546 parameters changed. For three case studies using tuning curves we found that by adding a  
547 traditionally omitted variable tuning curves showed less modulation due to the originally included  
548 variables. In models of single neuron dynamics, adding omitted variables led to decreased post-  
549 spike gain and greater apparent stability. Importantly, omitted variables can arise in GLMs in any  
550 situation where an omitted variable affects neural activity and the effect of the omitted variable is  
551 not independent of the included variables.

552 The case studies here are not unique, and many studies have described how adding additional  
553 variables to a tuning curve or single neuron model can improve prediction accuracy. In M1, in  
554 addition to movement speed, joint angles, muscle activity, end-point force, and many other  
555 variables also appear to modulate neural responses (Fetz, 1992; Kalaska, 2009). In addition to  
556 speed and head direction in the hippocampus, theta-band LFP, sharp-wave ripples, and  
557 environmental features, such as borders, appear to modulate neural activity (Hartley et al., 2014).  
558 And in V1, there is growing evidence that population activity (Lin et al., 2015) and non-visual  
559 information (Ghazanfar and Schroeder, 2006) modulates neural responses. In each of these  
560 systems, neural responses are affected by many, many factors. Responding to many task variables  
561 may even be functional, allowing downstream neurons to more effectively discriminate inputs  
562 (Fusi et al., 2016). In any case, it seems clear that our models do not yet capture the full complexity  
563 of neural responses (Carandini et al., 2005). By omitting relevant variables, current models are  
564 likely to be not just less accurate but also biased.

565 Parameter bias may be problematic in and of itself. However, omitted variable bias may also have  
566 an important effect on generalization performance. As noted in (Box, 1966), in a new context, the  
567 effect of the omitted variables and the relationship between the omitted and included variables  
568 may be different. Since the parameters of the included variables are biased, this change can  
569 reduce generalization accuracy. This phenomena may explain, to some extent, why tuning models  
570 fit in one condition often do not generalize to others (Graf et al., 2011; Oby et al., 2013). For models  
571 of single-neuron dynamics, omitted variable bias can also have a negative effect on the accuracy  
572 of simulations. Previous work has shown that simulating a GLM with post-spike filters estimated  
573 from data often results in unstable, diverging simulations. Although several methods for stabilizing  
574 these simulations have recently been developed (Gerhard et al., 2017; Hocker and Park, 2017),  
575 one, perhaps primary, reason for this instability may be that the post-spike filters are biased due  
576 to omitted synaptic input. Since estimated post-spike filters may reflect not just intrinsic neuron  
577 properties but also the statistics of the input, interpreting and comparing post-spike filters may be  
578 difficult. Different history parameters may be different due to intrinsic biophysics (Tripathy et al.,



579 2013) or due to differing input, and resolving this ambiguity will likely involve more accurately  
580 accounting for the input itself (Kim and Shinomoto, 2012).

581 The possibility of omitted variable bias does not mean that estimated parameters, predictions,  
582 and simulations from simplified model are useless, but it may mean that we need to be cautious  
583 in interpreting these models and their outputs. Previous studies have already identified several  
584 specific cases of omitted variable bias where careful interpretation is necessary. For instance,  
585 omitted common input can bias estimates of interactions between neurons (Brody, 1999), and  
586 omitted history effects can bias receptive field estimates (Pillow and Simoncelli, 2003). In  
587 estimating peri-stimulus time histograms, omitting variables that account for trial-to-trial variation  
588 may cause biases (Czanner et al., 2008) or issues with identifiability (Amarasingham et al., 2015).  
589 Similarly, biases due to spike sorting errors (Ventura, 2009) could be framed as a result of omitting  
590 variables related to missing/excess spikes. Since we typically do not model or observe all the  
591 variables that affect neural activity, omitted variable problems are likely to be pervasive in systems  
592 neuroscience far beyond these specific cases.

593 Although we have focused on GLMs here, omitted variable bias can also affect any model. Adding  
594 input nonlinearities (Ahrens et al., 2008; David et al., 2009), interaction effects (McFarland et al.,  
595 2013), or higher-order terms to the GLM (Berger et al., 2010; Park et al., 2013) may fix certain types  
596 of model misspecification, but any model that omits relevant variables is still likely to suffer from  
597 the same problems. This includes both machine learning methods that may provide better  
598 prediction accuracy than GLMs (Benjamin et al., 2017) and single neuron models aiming to  
599 describe greater biophysical detail (Herz et al., 2006). Unlike over-fitting or non-convergence (Zhao  
600 and Iyengar, 2010), omitted variable bias will generally not be resolved by including additional data  
601 or by adding regularization.

602 One approach that could potentially reduce omitted variable bias is latent variable modeling,  
603 where the effects of unknown covariates are explicitly included (constrained by simplifying  
604 assumptions). Recent work has introduced latent variables for neural activity with linear dynamics  
605 (Smith and Brown, 2003; Kulkarni and Paninski, 2007; Paninski et al., 2010), switching dynamics  
606 (Putzky et al., 2014), rectification (Whiteway and Butts, 2017), and oscillations (Arai and Kass, 2017).  
607 And these models appear to out-perform GLMs on population data in retina (Vidne et al., 2012),  
608 visual (Archer et al., 2014), and motor cortices (Chase et al., 2010; Macke et al., 2011). Inferring  
609 latent variables requires making (sometimes strong) assumptions about the nature of the  
610 variables and may require observations from multiple neurons or across multiple trials, but, by  
611 approximating some of the effects of relevant omitted variables, latent variables may reduce  
612 omitted variable bias. However, generally determining when relevant variables are omitted from  
613 a model and what those variables are is not a trivial problem.

614 There is a well-known aphorism from George EP Box that, "All models are wrong, but some are  
615 useful." The lengthier version of this quip is, "All models are approximations. Essentially, all models  
616 are wrong, but some are useful. However, the approximate nature of the model must always be  
617 borne in mind." GLMs are certainly useful descriptions of neural activity. They are computationally

618 tractable, can disentangle the relative influence of multiple covariates, and often provide the core  
619 components for Bayesian decoders. Here we emphasize, however, one ubiquitous circumstance  
620 in systems neuroscience where the “approximate nature” of the models should be “borne in mind.”  
621 Namely, omitted variables can bias estimates of the included effects.

## 622 **Methods**

### 623 **Neural Data**

624 All data analyzed here was previously recorded and shared by other researchers through the  
625 Collaborative Research in Computation Neuroscience (CRCNS) Data Sharing Initiative ([crcns.org](http://crcns.org)).

626 Data from primary motor cortex is from CRCNS dataset DREAM-Stevenson\_2011 (Walker and  
627 Kording, 2013). These data were recorded using a 100-electrode Utah array (Blackrock  
628 Microsystems, 400 mm spacing, 1.5 mm length) chronically implanted in the arm area of primary  
629 motor cortex of an adult macaque monkey. The monkey made center-out reaches in a 20x20cm  
630 workspace while seated in a primate chair, grasping a two-link manipulandum in the horizontal  
631 plane (arm roughly in a sagittal plane). Each trial for the center-out task began with a hold period  
632 at a center target (0.3–0.5 s). After a go cue, subjects had 1.25 s to reach one of eight peripheral  
633 targets and then held this outer target for at least 0.2–0.5 s. Each success was rewarded with juice,  
634 and feedback (1-2cm diam) about arm position was displayed onscreen as a circular cursor. Spike  
635 sorting was performed by manual cluster cutting using an offline sorter (Plexon, Inc) with  
636 waveforms classified as single- or multi-unit based on action potential shape and minimum ISIs  
637 greater than 1.6 ms (yielding n=81 single units). Here we take model tuning curves using spike  
638 counts between 150ms before to 350ms after the speed reached its half-max. Average movement  
639 speed for each trial was calculated from 0-250ms after the speed reached its half-max (290 trials  
640 in total). For the details of the surgery, recording, and spike sorting see (Stevenson et al., 2011).

641 Hippocampal data is from CRCNS HC-3 (Mizuseki et al., 2013). Here we use recording sessions  
642 ec16.19.272 and ec014.215, where a Long-Evans rat was sleeping and foraging in a 180x180cm  
643 maze, respectively. For both recordings, 12-shank silicon probes (with 8 recording sites each, 20 $\mu$ m  
644 separation) were implanted in CA1 (8 shanks) and EC3-5 (4 shanks) (based on histology). Spikes  
645 were sorted automatically using KlustaKwick and then manually adjusted (Klusters) yielding 85  
646 units for the sleep data and 117 for the open field data. For the sleep data where we model post-  
647 spike history effects, the spike trains were binned at 1ms and the recording length was 27min.  
648 Here we model all neurons with firing rates >0.5Hz (n=39). For the open field data where we model  
649 place tuning, spike trains were binned at 250ms and the recording length was 93min. Place cells  
650 (n=68) were selected based on having an overall firing rate <5Hz (to rule out interneurons), a peak  
651 firing rate >2Hz, and a contiguous set of pixels (after smoothing with an isotropic Gaussian  $\sigma=8$ cm)  
652 of at least 200 cm<sup>2</sup> where the firing rate was above 10% of the peak rate. For details of the surgery,  
653 recording, and spike sorting see (Diba and Buzsaki, 2008; Mizuseki et al., 2009).

654 Data from primary visual cortex is from CRCNS dataset PVC-11 (Kohn and Smith, 2016). Here we  
655 use spontaneous activity, during a gray screen, (Monkey 1) and responses to drifting sine-wave

656 gratings (Monkey 1) both from an anesthetized (Sufentanil - 4-18 microg/kg/hr) adult monkey  
657 (Macaca fascicularis). Recordings were made in parafoveal V1 (RFs within 5 degrees of the fovea)  
658 using a 96-channel multi-electrode array (Blackrock Microsystems), 400 mm electrode spacing,  
659 1mm depth. After automatic spike sorting and manual cluster adjustment, 87 and 106 units were  
660 recorded during spontaneous activity and grating presentation, respectively. Only neurons with  
661 waveform SNR>2 and firing rates >1Hz were analyzed, n=62 for spontaneous and n=90 for grating  
662 data. For the spontaneous activity we bin spike counts at 1ms and the recording length was 20min.  
663 For the drifting grating data, we analyzed spike counts from 200ms to 1.2s after stimulus onset on  
664 each trial - 12 directions, 2400 trials total. Gratings had a spatial frequency of 1.3 cyc/deg, temporal  
665 frequency of 6.25Hz, size of 8-10 deg (to cover receptive fields of all recorded neurons) and were  
666 presented for 1.25s with a 1.5s inter-trial interval between stimuli. For surgical, stimulus, and  
667 preprocessing details see (Smith and Kohn, 2008; Kelly et al., 2010).

### 668 **Tuning Curve Models**

669 For the M1 data we use a circular, cubic B-spline basis with 5 equally spaced knots

$$670 \quad \lambda(\theta) = \exp\left(\mu + \sum_i \beta_i g_i(\theta)\right)$$

671 where  $g(\cdot)$  are the splines that depend on the reach direction  $\theta$ , weighted by parameters  $\beta$  and  
672 the parameter  $\mu$  defines a baseline firing rate. To include the effect of speed, we then add three  
673 covariates

$$674 \quad \lambda(\theta, s) = \exp\left(\mu + \sum_i \beta_i g_i(\theta) + \alpha_1 s + \alpha_2 s \cos(\theta) + \alpha_3 s \sin(\theta)\right)$$

675 where  $s$  indicates the speed, and the parameters  $\alpha$  allow for a multiplicative speed effect as well  
676 as possible cosine-tuned speed x direction interactions as in (Moran and Schwartz, 1999).

677 For place fields in hippocampus we use isotropic Gaussian radial basis functions  $f(\cdot)$  equally  
678 spaced (30cm) on an 6x6 square lattice with a standard deviation of 30cm

$$679 \quad \lambda(x) = \exp\left(\mu + \sum_i \beta_i f_i(x)\right)$$

680 We find that the effect of speed is well modeled using the log-transformed speed  $s$ , and to model  
681 head direction-dependence we use circular, cubic B-splines  $g(\cdot)$  with 6 equally spaced knots

$$682 \quad \lambda(x, s, \theta) = \exp\left(\mu + \sum_i \beta_i f_i(x) + \gamma \log s + \sum_j \alpha_j g_j(\theta)\right)$$

683 For the V1 data we again use a circular, cubic B-spline basis for the direction of the sine-wave  
684 grating (7 equally spaced knots).

$$685 \quad \lambda(\theta) = \exp\left(\mu + \sum_i \beta_i g_i(\theta)\right)$$

686 We find that the effect of population activity is well modeled using the total log-transformed firing  
 687 rate of all neuron's excepting the one being modeled

$$688 \quad \lambda(\theta, z) = \exp\left(\mu + \sum_i \beta_i g_i(\theta) + \alpha z\right)$$

689 where  $z = \sum_{i \neq j} \log(n_i + 1)$ . In all models, to avoid overfitting, especially for low firing rate neurons,  
 690 we add a small L2 penalty to the log-likelihood with a fixed hyperparameter of  $10^{-4}$ .

## 691 **Post-spike History Simulations and Population Rate Models**

692 In addition to capturing tuning curves, many studies have used GLMs to describe the dynamics of  
 693 single spike trains (Brillinger, 1988; Harris et al., 2003; Paninski, 2004; Okatan et al., 2005; Truccolo  
 694 et al., 2005; Weber and Pillow, 2017). Here, to account for post-spike history effects, we use a GLM  
 695 taking the form

$$696 \quad \lambda(t) = \exp(\mu + ah(t))$$

$$697 \quad n(t) \sim \text{Poisson}(\lambda(t)\Delta t)$$

698 where  $h(t)$  denotes the vector of spike history covariates representing the recent history of spiking  
 699 and  $\mu$  determines a baseline firing rate. Here we assume  $h_i(t) = \sum_{\tau > 0} f_i(\tau)n(t - \tau)$ , and we use  
 700 neuron-specific, cubic B-spline bases  $f(\cdot)$  whose knots are determined by the quantiles of each  
 701 neuron's ISI distribution. Specifically, we choose knots spaced between 10 and 400ms (HC) or 2  
 702 and 200ms (V1), where the spacing follows equal percentile regions of the ISI distribution in that  
 703 same range. This gives 6 basis functions, and coefficients  $\alpha$  to capture the spike-history. To enforce  
 704 refractoriness, we fix the coefficient of the fastest basis (which peaks at 0 and ends at 10ms) to be  
 705 -5, leaving 5 coefficients to be estimated.

706 The population rate model simply adds covariates where, for each neuron  $i$

$$707 \quad \lambda_i(t) = \exp\left(\mu_i + \alpha_i h_i(t) + \beta_i g\left(\sum_j n_{j \neq i}(t)\right)\right)$$

$$708 \quad n_i(t) \sim \text{Poisson}(\lambda_i(t)\Delta t)$$

709 Here we use a set of acausal Gaussian filters for  $g(\cdot)$  with standard deviations 20, 50, and 100ms.  
 710 Note that spikes from the neuron being modeled are excluded from the population covariates.

## 711 **Stability analysis**

712 Here we make use of a stability analysis proposed in (Gerhard et al., 2017). Briefly, we use a quasi-  
 713 renewal approximation of the conditional intensity by considering the effect of the most recent  
 714 spike, at time  $t'$ , and averaging over possible spike histories preceding this spike

$$715 \quad \lambda_0(t, t') = \exp(\mu + H(t - t')) \langle \exp(H * S) \rangle_{S(t < t')}$$

716 where  $H(t - t') = \alpha f(t - t')$  and  $S$  represents the history of spiking. By assuming that  $S$  is  
 717 generated from a homogeneous Poisson process with firing rate  $A_0$ , the second term can be  
 718 approximated by

$$719 \quad \langle \exp(H * S) \rangle_{S(t < t')} \approx \exp \left( A_0 \int_{t-t'}^{\infty} (e^{H(u)} - 1) du \right)$$

720 Given this approximation, we can then estimate the inter-spike interval distribution as we would  
 721 for a true renewal process and the steady-state distribution of inter-spike intervals is given by

$$722 \quad P(\tau) = \exp \left( - \int_0^{\tau} \lambda_0(u) du \right) \lambda_0(\tau)$$

723 and the predicted steady-state firing rate is  $f(A_0) = 1/E_{P(\tau)}[\tau]$ .

724 To assess stability, we can then examine how the predicted steady-state firing rate depends on  
 725 the assumed rate of the homogeneous Poisson process  $A_0$ . In particular, when  $f(A_0) = A_0$  the  
 726 quasi-renewal model has a fixed-point. To allow for external input, we incorporate the average  
 727 effect of the covariates  $X$  into the conditional intensity approximation

$$728 \quad \lambda_0(t, t') = \exp(\mu + h(t - t') + \langle X\beta \rangle) \langle \exp(h * S) \rangle_{S(t < t')}$$

$$729 \quad \lambda_0(t, t') = \exp(\mu + h(t - t')) \langle \exp(X\beta) \rangle_t \langle \exp(h * S) \rangle_{S(t < t')}$$

730 Note that, in general, adding inputs  $X$  will only change the stability of the model to the extent that  
 731 these covariates change the estimate of  $h$ .

732

## 733 References

- 734 **Ahrens MB, Paninski L, Sahani M.** Inferring input nonlinearities in neural encoding models. *Netw. Comput.*  
735 *Neural Syst.* 19: 35–67, 2008.
- 736 **Amarasingham A, Geman S, Harrison MT.** Ambiguity and nonidentifiability in the statistical analysis of  
737 neural codes. *Proc. Natl. Acad. Sci. U. S. A.* 112: 6455–60, 2015.
- 738 **Amirikian B, Georgopoulos AP.** Directional tuning profiles of motor cortical cells. 36: 73–79, 2000.
- 739 **Arai K, Kass RE.** Inferring oscillatory modulation in neural spike trains. *PLOS Comput. Biol.* 13: e1005596,  
740 2017.
- 741 **Arandia-Romero I, Tanabe S, Drugowitsch J, Kohn A, Moreno-Bote R.** Multiplicative and Additive  
742 Modulation of Neuronal Tuning with Population Activity Affects Encoded Information. *Neuron* 89: 1305–  
743 1316, 2016.
- 744 **Archer EW, Koster U, Pillow JW, Macke JH.** Low-dimensional models of neural population activity in  
745 sensory cortical circuits. In: *Advances in Neural Information Processing Systems* 27. 2014, p. 343–351.
- 746 **Arieli A, Sterkin A, Grinvald A, Aertsen A.** Dynamics of Ongoing Activity: Explanation of the Large  
747 Variability in Evoked Cortical Responses. *Science* 273: 1868–1871, 1996.
- 748 **Benjamin AS, Fernandes HL, Tomlinson T, Ramkumar P, VerSteeg C, Miller L, Kording KP.** Modern  
749 machine learning far outperforms GLMs at predicting spikes. *bioRxiv* ( February 24, 2017). doi:  
750 10.1101/111450.
- 751 **Berger TW, Song D, Chan RHM, Marmarelis VZ.** The Neurobiological Basis of Cognition: Identification by  
752 Multi-Input, Multioutput Nonlinear Dynamic Modeling: A method is proposed for measuring and modeling  
753 human long-term memory formation by mathematical analysis and computer simulation of nerve-cell .  
754 *Proc. IEEE* 98: 356–374, 2010.
- 755 **Box GEP.** Use and Abuse of Regression. *Technometrics* 8: 625, 1966.
- 756 **Brillinger DR.** Maximum likelihood analysis of spike trains of interacting nerve cells. *Biol. Cybern.* 59: 189–  
757 200, 1988.
- 758 **Brillinger DR, Segundo JP.** Empirical examination of the threshold model of neuron firing. *Biol. Cybern.* 35:  
759 213–220, 1979.
- 760 **Brody CD.** Disambiguating Different Covariation Types. *Neural Comput.* 11: 1527–1535, 1999.
- 761 **Brown E, Barbieri R, Eden U, Frank L.** Likelihood methods for neural data analysis. In: *Computational*  
762 *Neuroscience: a comprehensive approach*, edited by Feng J. London: Chapman and Hall, 2003, p. 253–286.
- 763 **Carandini M, Demb JB, Mante V, Tolhurst DJ, Dan Y, Olshausen BA, Gallant JL, Rust NC.** Do we know  
764 what the early visual system does? *J. Neurosci.* 25: 10577, 2005.
- 765 **Chase SM, Schwartz AB, Kass RE.** Latent Inputs Improve Estimates of Neural Encoding in Motor Cortex. *J.*  
766 *Neurosci.* 30: 13873–13882, 2010.
- 767 **Churchland MM, Santhanam G, Shenoy K V.** Preparatory Activity in Premotor and Motor Cortex Reflects  
768 the Speed of the Upcoming Reach. *J. Neurophysiol.* 96: 3130, 2006.
- 769 **Clarke KA.** The Phantom Menace: Omitted Variable Bias in Econometric Research. *Confl. Manag. Peace Sci.*  
770 22: 341–352, 2005.

- 771 **Clogg CC, Petkova E, Shihadeh ES.** Statistical Methods for Analyzing Collapsibility in Regression Models. *J.*  
772 *Educ. Stat.* 17: 51, 1992.
- 773 **Czanner G, Eden UT, Wirth S, Yanike M, Suzuki WA, Brown EN.** Analysis of between-trial and within-trial  
774 neural spiking dynamics. *J. Neurophysiol.* 99: 2672–2693, 2008.
- 775 **David S V, Mesgarani N, Fritz JB, Shamma SA.** Rapid synaptic depression explains nonlinear modulation  
776 of spectro-temporal tuning in primary auditory cortex by natural stimuli. *J. Neurosci.* 29: 3374, 2009.
- 777 **Destexhe A, Rudolph M, Fellous JM, Sejnowski TJ.** Fluctuating synaptic conductances recreate in vivo-like  
778 activity in neocortical neurons. *Neuroscience* 107: 13–24, 2001.
- 779 **Destexhe A, Rudolph M, Paré D.** The high-conductance state of neocortical neurons in vivo. *Nat. Rev.*  
780 *Neurosci.* 4: 739–751, 2003.
- 781 **Diba K, Buzsáki G.** Hippocampal Network Dynamics Constrain the Time Lag between Pyramidal Cells  
782 across Modified Environments. *J. Neurosci.* 28: 13448–13456, 2008.
- 783 **Fernandes HL, Stevenson IH, Phillips AN, Segraves MA, Kording KP.** Saliency and saccade encoding in  
784 the frontal eye field during natural scene search. *Cereb. Cortex* 24, 2014.
- 785 **Fetz EE.** Are movement parameters recognizably coded in the activity of single neurons? *Behav. Brain Sci.*  
786 15: 679–690, 1992.
- 787 **Fitts PM.** The information capacity of the human motor system in controlling the amplitude of movement.  
788 *J. Exp. Psychol.* 47: 381–391, 1954.
- 789 **Fusi S, Miller EK, Rigotti M.** Why neurons mix: high dimensionality for higher cognition. *Curr. Opin.*  
790 *Neurobiol.* 37: 66–74, 2016.
- 791 **Georgopoulos AP, Kalaska JF, Caminiti R, Massey JT.** On the relations between the direction of two-  
792 dimensional arm movements and cell discharge in primate motor cortex. *J. Neurosci.* 2: 1527–1537, 1982.
- 793 **Gerhard F, Deger M, Truccolo W.** On the stability and dynamics of stochastic spiking neuron models:  
794 Nonlinear Hawkes process and point process GLMs. *PLoS Comput. Biol.* 13: e1005390, 2017.
- 795 **Gerhard F, Kispersky T, Gutierrez GJ, Marder E, Kramer M, Eden U.** Successful Reconstruction of a  
796 Physiological Circuit with Known Connectivity from Spiking Activity Alone. *PLoS Comput. Biol.* 9: e1003138,  
797 2013.
- 798 **Ghazanfar AA, Schroeder CE.** Is neocortex essentially multisensory? *Trends Cogn. Sci.* 10: 278–285, 2006.
- 799 **Graf ABA, Kohn A, Jazayeri M, Movshon JA.** Decoding the activity of neuronal populations in macaque  
800 primary visual cortex. *Nat. Neurosci.* 14: 239–245, 2011.
- 801 **Greenland S.** Modeling and variable selection in epidemiologic analysis. *Am. J. Public Health* 79: 340–9,  
802 1989.
- 803 **Harris KD, Csicsvari J, Hirase H, Dragoi G, Buzsáki G.** Organization of cell assemblies in the  
804 hippocampus. *Nature* 424: 552–556, 2003.
- 805 **Hartley T, Lever C, Burgess N, O’Keefe J.** Space in the brain: how the hippocampal formation supports  
806 spatial cognition. *Philos. Trans. R. Soc. Lond. B. Biol. Sci.* 369: 20120510, 2014.
- 807 **Herz AVM, Gollisch T, Machens CK, Jaeger D.** Modeling single-neuron dynamics and computations: a  
808 balance of detail and abstraction. *Science* 314: 80–5, 2006.

- 809 **Hocker D, Park IM.** Multistep inference for generalized linear spiking models curbs runaway excitation. In:  
810 *2017 8th International IEEE/EMBS Conference on Neural Engineering (NER)*. IEEE, p. 613–616.
- 811 **Humphrey DR, Schmidt EM, Thompson WD.** Predicting measures of motor performance from multiple  
812 cortical spike trains. *Science* 170: 758–62, 1970.
- 813 **Kalaska JF.** From Intention to Action: Motor Cortex and the Control of Reaching Movements. Springer,  
814 Boston, MA, p. 139–178.
- 815 **Kandler S, Mao D, McNaughton BL, Bonin V.** Encoding of Tactile Context in the Mouse Visual Cortex.  
816 *bioRxiv* ( October 6, 2017). doi: 10.1101/199364.
- 817 **Kass RE, Ventura V, Brown EN.** Statistical Issues in the Analysis of Neuronal Data. *J. Neurophysiol.* 94: 8–  
818 25, 2005.
- 819 **Kelly RC, Smith MA, Kass RE, Lee TS.** Local field potentials indicate network state and account for  
820 neuronal response variability. *J. Comput. Neurosci.* 29: 567–579, 2010.
- 821 **Kim H, Shinomoto S.** Estimating nonstationary input signals from a single neuronal spike train. *Phys. Rev. E*  
822 86: 051903, 2012.
- 823 **Kohn A, Smith MA.** Utah array extracellular recordings of spontaneous and visually evoked activity from  
824 anesthetized macaque primary visual cortex (V1). CRCNS.org. 2016.
- 825 **Kulkarni JE, Paninski L.** Common-input models for multiple neural spike-train data. *Netw. Comput. Neural*  
826 *Syst.* 18: 375–407, 2007.
- 827 **Lin I-C, Okun M, Carandini M, Harris KD.** The Nature of Shared Cortical Variability. *Neuron* 87: 644–656,  
828 2015.
- 829 **Macke J, Büsing L, Cunningham J, Yu B, Shenoy K, Sahani M.** Empirical models of spiking in neural  
830 populations. In: *Advances in Neural Information Processing Systems*. 2011, p. 1350–1358.
- 831 **McFarland JM, Cui Y, Butts DA.** Inferring Nonlinear Neuronal Computation Based on Physiologically  
832 Plausible Inputs. *PLoS Comput. Biol.* 9: e1003143, 2013.
- 833 **McNaughton BL, Barnes CA, O’Keefe J.** The contributions of position, direction, and velocity to single unit  
834 activity in the hippocampus of freely-moving rats. *Exp. Brain Res.* 52: 41–49, 1983.
- 835 **Mizuseki K, Sirota A, Pastalkova E, Buzsáki G.** Theta oscillations provide temporal windows for local  
836 circuit computation in the entorhinal-hippocampal loop. *Neuron* 64: 267–280, 2009.
- 837 **Mizuseki K, Sirota A, Pastalkova E, Diba K, Buzsáki G.** Multiple single unit recordings from different rat  
838 hippocampal and entorhinal regions while the animals were performing multiple behavioral tasks.  
839 CRCNS.org. 2013.
- 840 **Moran DW, Schwartz a B.** Motor cortical representation of speed and direction during reaching. *J.*  
841 *Neurophysiol.* 82: 2676–2692, 1999.
- 842 **Niell CM, Stryker MP.** Modulation of Visual Responses by Behavioral State in Mouse Visual Cortex. *Neuron*  
843 65: 472–479, 2010.
- 844 **O’Keefe J, Dostrovsky J.** The hippocampus as a spatial map: Preliminary evidence from unit activity in the  
845 freely-moving rat. *Brain Res.* 34: 171–175, 1971.
- 846 **Oby ER, Ethier C, Miller LE.** Movement representation in the primary motor cortex and its contribution to



- 847 generalizable EMG predictions. *J. Neurophysiol.* 109: 666–678, 2013.
- 848 **Okatan M, Wilson MA, Brown EN.** Analyzing Functional Connectivity Using a Network Likelihood Model of  
849 Ensemble Neural Spiking Activity. *Neural Comput.* 17: 1927–1961, 2005.
- 850 **Okun M, Steinmetz NA, Cossell L, Iacaruso MF, Ko H, Barthó P, Moore T, Hofer SB, Mrcsic-Flogel TD,**  
851 **Carandini M, Harris KD.** Diverse coupling of neurons to populations in sensory cortex. *Nature* 521: 511–  
852 515, 2015.
- 853 **Omrani M, Kaufman MT, Hatsopoulos NG, Cheney PD.** Perspectives on classical controversies about the  
854 motor cortex. *J. Neurophysiol.* 118: 1828–1848, 2017.
- 855 **Paninski L.** Maximum likelihood estimation of cascade point-process neural encoding models. *Netw.*  
856 *Comput. Neural Syst.* 15: 243–262, 2004.
- 857 **Paninski L, Ahmadian Y, Ferreira DG, Koyama S, Rahnema Rad K, Vidne M, Vogelstein J, Wu W.** A new  
858 look at state-space models for neural data. *J. Comput. Neurosci.* 29: 107–126, 2010.
- 859 **Park IM, Archer EW, Priebe N, Pillow JW.** Spectral methods for neural characterization using generalized  
860 quadratic models [Online]. : 2454–2462, 2013. [http://papers.nips.cc/paper/4993-spectral-methods-for-](http://papers.nips.cc/paper/4993-spectral-methods-for-neural-characterization-using-generalized-quadratic-models)  
861 [neural-characterization-using-generalized-quadratic-models](http://papers.nips.cc/paper/4993-spectral-methods-for-neural-characterization-using-generalized-quadratic-models) [4 May. 2018].
- 862 **Park IM, Meister MLR, Huk AC, Pillow JW.** Encoding and decoding in parietal cortex during sensorimotor  
863 decision-making. *Nat. Neurosci.* 17: 1395–1403, 2014.
- 864 **Pillow J.** Likelihood-Based Approaches to Modeling the Neural Code. In: *Bayesian brain: Probabilistic*  
865 *approaches to neural coding*, edited by Kenji Doya Alexandre Pouget, and Rajesh P.N. Rao SI. MIT Press,  
866 2007, p. 53–70.
- 867 **Pillow JW, Shlens J, Paninski L, Sher A, Litke AM, Chichilnisky EJ, Simoncelli EP.** Spatio-temporal  
868 correlations and visual signalling in a complete neuronal population. *Nature* 454: 995–999, 2008.
- 869 **Pillow JW, Simoncelli EP.** Biases in white noise analysis due to non-Poisson spike generation.  
870 *Neurocomputing* 52–54: 109–115, 2003.
- 871 **Putzky P, Franzen F, Bassetto G, Macke JH.** A Bayesian model for identifying hierarchically organised  
872 states in neural population activity [Online]. : 3095–3103, 2014. [http://papers.nips.cc/paper/5338-a-](http://papers.nips.cc/paper/5338-a-bayesian-model-for-identifying-hierarchically-organised-states-in-neural-population-activity)  
873 [bayesian-model-for-identifying-hierarchically-organised-states-in-neural-population-activity](http://papers.nips.cc/paper/5338-a-bayesian-model-for-identifying-hierarchically-organised-states-in-neural-population-activity) [4 May. 2018].
- 874 **Reimer J, Froudarakis E, Cadwell CR, Yatsenko D, Denfield GH, Tolias AS.** Pupil Fluctuations Track Fast  
875 Switching of Cortical States during Quiet Wakefulness. *Neuron* 84: 355–362, 2014.
- 876 **Runyan CA, Piasini E, Panzeri S, Harvey CD.** Distinct timescales of population coding across cortex.  
877 *Nature* 548: 92–96, 2017.
- 878 **Smith AC, Brown EN.** Estimating a State-Space Model from Point Process Observations. *Neural Comput.*  
879 15: 965–991, 2003.
- 880 **Smith MA, Kohn A.** Spatial and temporal scales of neuronal correlation in primary visual cortex. *J.*  
881 *Neurosci.* 28: 12591–12603, 2008.
- 882 **Stevenson IH, Cherian A, London BM, Sachs NA, Lindberg E, Reimer J, Slutzky MW, Hatsopoulos NG,**  
883 **Miller LE, Kording KP.** Statistical assessment of the stability of neural movement representations. *J.*  
884 *Neurophysiol.* 106, 2011.
- 885 **Stringer C, Pachitariu M, Steinmetz N, Reddy CB, Carandini M, Harris KD.** Spontaneous behaviors drive

- 886 multidimensional, brain-wide population activity. *bioRxiv* ( April 22, 2018). doi: 10.1101/306019.
- 887 **Tripathy SJ, Padmanabhan K, Gerkin RC, Urban NN.** Intermediate intrinsic diversity enhances neural  
888 population coding. *Proc. Natl. Acad. Sci. U. S. A.* 110: 8248–53, 2013.
- 889 **Truccolo W, Eden UT, Fellows MR, Donoghue JP, Brown EN.** A Point Process Framework for Relating  
890 Neural Spiking Activity to Spiking History, Neural Ensemble, and Extrinsic Covariate Effects. *J. Neurophysiol.*  
891 93: 1074–1089, 2005.
- 892 **Truccolo W, Hochberg LR, Donoghue JP.** Collective dynamics in human and monkey sensorimotor cortex:  
893 predicting single neuron spikes. *Nat. Neurosci.* 13: 105–111, 2010.
- 894 **Ventura V.** Traditional waveform based spike sorting yields biased rate code estimates. *Proc. Natl. Acad.*  
895 *Sci.* 106: 6921, 2009.
- 896 **Vidne M, Ahmadian Y, Shlens J, Pillow JW, Kulkarni J, Litke AM, Chichilnisky EJ, Simoncelli E, Paninski**  
897 **L.** Modeling the impact of common noise inputs on the network activity of retinal ganglion cells. *J. Comput.*  
898 *Neurosci.* 33: 97–121, 2012.
- 899 **Volgushev M, Ilin V, Stevenson IH.** Identifying and Tracking Simulated Synaptic Inputs from Neuronal  
900 Firing: Insights from In Vitro Experiments. *PLOS Comput. Biol.* 11: e1004167, 2015.
- 901 **Walker B, Kording K.** The Database for Reaching Experiments and Models. *PLoS One* 8: e78747, 2013.
- 902 **Walsh RN, Cummins RA.** The open-field test: A critical review. *Psychol. Bull.* 83: 482–504, 1976.
- 903 **Weber AI, Pillow JW.** Capturing the Dynamical Repertoire of Single Neurons with Generalized Linear  
904 Models. *Neural Comput.* 29: 3260–3289, 2017.
- 905 **Whiteway MR, Butts DA.** Revealing unobserved factors underlying cortical activity with a rectified latent  
906 variable model applied to neural population recordings. *J. Neurophysiol.* 117: 919–936, 2017.
- 907 **Zhao M, Iyengar S.** Nonconvergence in logistic and poisson models for neural spiking. *Neural Comput.* 22:  
908 1231–1244, 2010.
- 909
